# Supplementary material
Source: PubMed Central journal article supplement (PMC4732899)

**A**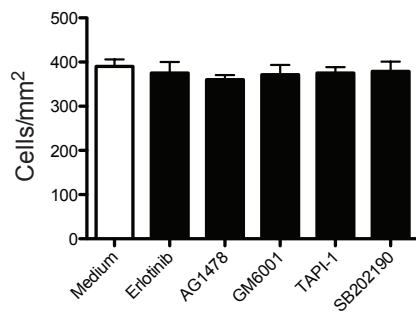**B**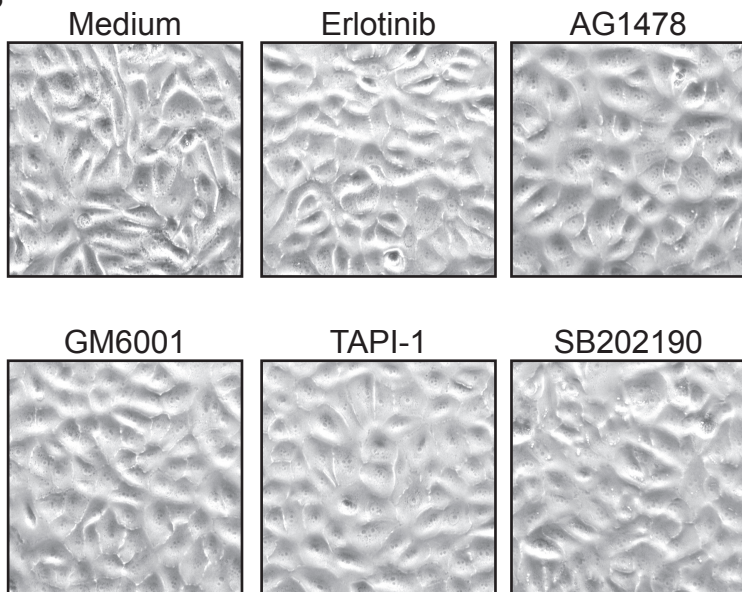

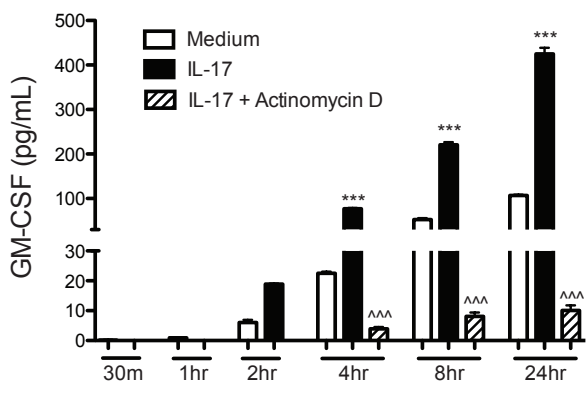

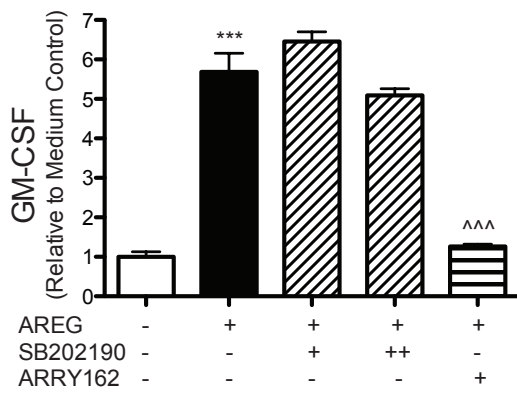

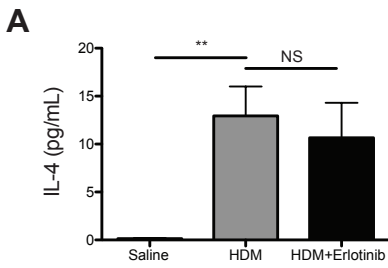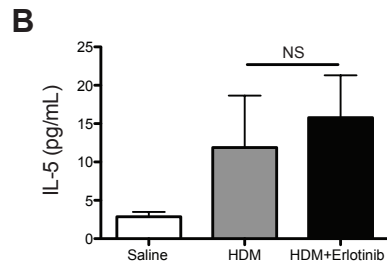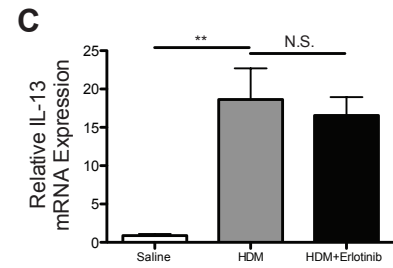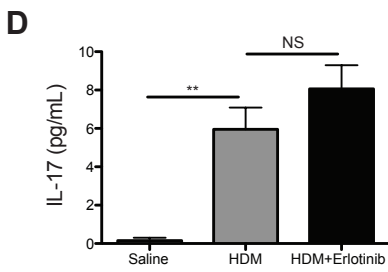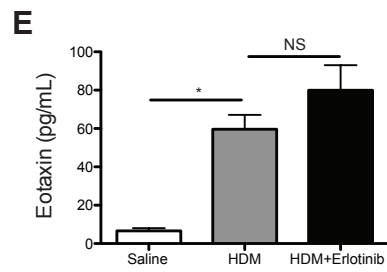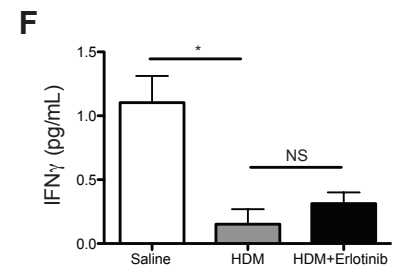

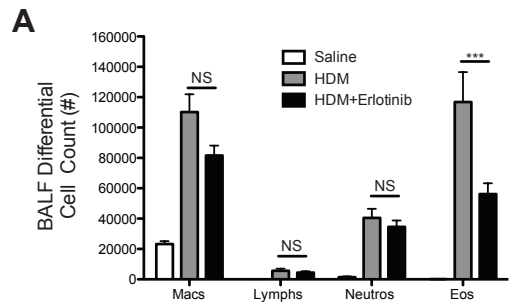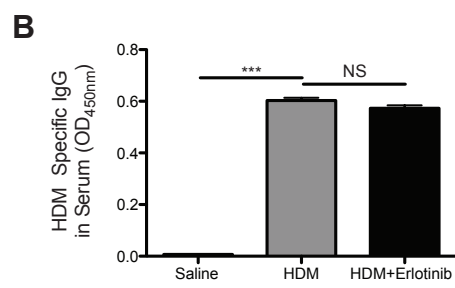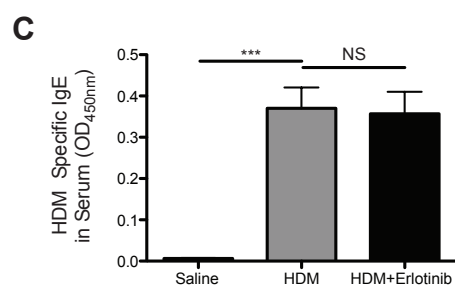

Supplement: NIHMS715067-supplement-Supp_FigureS1-S5.pdf [file NIHMS715067-supplement-Supp_FigureS1-S5.pdf]
